# Supplementary material for: Effects of long-term mowing on the fractions and chemical composition of soil organic matter in a semiarid grassland
Source: Copernicus journal article supplement (doi:10.5194/bg-2016-461), 2016-11-28
Supplement: Supplementary file 1 [file bg-2016-461-supplement.pdf]

**Title:**

**Effects of long-term mowing on the fractions and chemical composition of soil organic matter in a semiarid grassland**

Jiangye Li, Qichun Zhang<sup>\*</sup>, Yong Li, Hongjie Di

Zhejiang Provincial Key Laboratory of Agricultural Resources and Environment, Key Laboratory of Environment Remediation and Ecological Health,  
Ministry of Education, Zhejiang University, Hangzhou 310058

\* Corresponding author. E-mail: qc Zhang@zju.edu.cn; Tel: + 86 – 571 – 8898 – 2413; Fax: + 86 – 571 – 88982413

**Table S1**<sup>13</sup>C-NMR assignment and potential source of functional groups

| Chemical shift (ppm) | Assignment                       | Compounds derived                                                                                                                                                      | Potential sources                                                                                      | References                                                    |
|----------------------|----------------------------------|------------------------------------------------------------------------------------------------------------------------------------------------------------------------|--------------------------------------------------------------------------------------------------------|---------------------------------------------------------------|
| 45 – 0               | Alkyl C                          | Terminal methyl, long-chain aliphatics, fatty acids, acetate, polymethylene, waxes, cutins, suberins, lipids, hemcellulose, tannin, lignin, resins, peptide side-chain | Microbial biomass (cellular residues), litter, roots, plant derived biopolymers (plant roots residues) | Mathers et al., 2007; Madalena et al., 2013; Mao et al., 2008 |
| 60 – 45              | <i>N</i> -alkyl / methoxyl C     | amino acids, lignin and peptide residues,                                                                                                                              | Microbial biomass, degraded products of plant litter                                                   | Mathers et al., 2007                                          |
| 90 – 60              | <i>O</i> -alkyl/C2 – C6          | Carbohydrates, celluloses, hemicellulose, polysaccharides, alcholes, amino sugars, side-chain of lignin                                                                | Root exudates, bacterial biomass, plant litter                                                         | Kogel-Knabner, et al., 2002;                                  |
| 110 – 90             | di- <i>O</i> -alkyl / anomeric C | Anomeric C1 of celluloses, tannin and lignin components                                                                                                                | Plant litter                                                                                           | Mathers et al., 2007                                          |
| 140 – 160            | Aryl C                           | Polyphenols, lignin, tannin components, C- and H-substituted, aromatic C olefinic C                                                                                    | Litter, roots, charcoal                                                                                | Mathers et al., 2007                                          |
| 160 – 140            | <i>O</i> -aryl C                 | Phenols, lignin/tannin components/indicators, suberin, O- and N-                                                                                                       | Plant litter,                                                                                          | Panitieri, et al., 2014; Mathers et al., 2007                 |

---

|           |            |                                                                                                               |                      |
|-----------|------------|---------------------------------------------------------------------------------------------------------------|----------------------|
| 190 – 160 | Carboxyl C | substituted aromatic C,<br>olefinic C, black carbon<br>Carboxylic acids, amide<br>and ester C, organic acids, | Mathers et al., 2007 |
| 210 – 190 | Ketone C   | Carbonyl C groups,<br>organic acids, ketones,<br>quinoe and aldehydes                                         | Mathers et al., 2007 |

---
